# Supplementary material
Source: bioRxiv or medRxiv preprint supplement (https://www.biorxiv.org/highwire/filestream/108602/field_highwire_adjunct_files/33/178806-5.pdf)
Supplement: Supplementary file [file 178806-5.pdf]

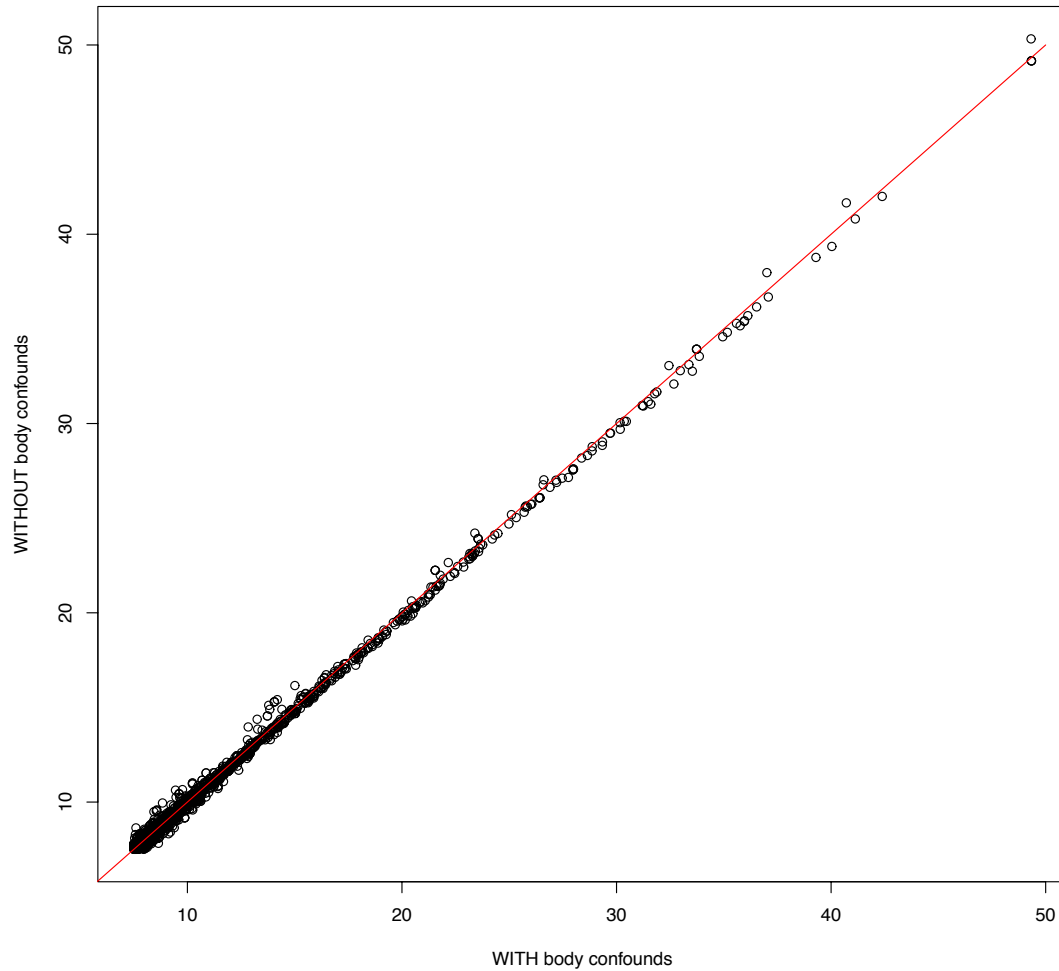

**Supplementary Figure 5. Association of IDPs with and without Body Confounds.** The GWAS for all 3,144 IDPs was run with and without correcting for the 4 classes of body confounds (blood pressure, height, weight and bone density). The top associations across all the GWAS ( $-\log_{10} p\text{-value} > 7.5$ ) with and without body confound correction are plotted against each other in the figure.
